# 1 Estimation of SARS-CoV-2 emissions from non-symptomatic cases

2 A.A.Prof. Dr. Michael Riediker<sup>1</sup>, Dr. Dai-Hua Tsai<sup>1,2</sup>

3 1 Swiss Centre for Occupational and Environmental Health, Winterthur, Switzerland

4 2 Department of Child and Adolescent Psychiatry and Psychotherapy, University Hospital of

5 Psychiatry Zurich, University of Zurich, Zurich, Switzerland

## 6 Key Points

7 **Question:** How much SARS-CoV-2 virus is released from a case by breathing and coughing,  
8 and what is the resulting concentration in a room?

9 **Finding:** Both, breathing and coughing are predicted to release large numbers of viruses,  
10 which can lead to billions of virus copies/m<sup>3</sup> in a poorly ventilated room with a coughing  
11 emitter.

12 **Meaning:** These results may explain the high rate of transmissions and implies the need for  
13 strict respiratory protection when people are in the same room with a COVID-19 case.

## 14 Word counts:

15 Abstract: 272, Manuscript: 1801, Tables: 1, Figures: 3

## 16 Address for correspondence

17 Michael Riediker

18 michael.riediker@alumni.ethz.ch

19 Swiss Centre for Occupational and Environmental Health (SCOEH)

20 Binzhoferstrasse 87, CH-8404 Winterthur, Switzerland

NOTE: This preprint reports new research that has not been certified by peer review and should not be used to guide clinical practice.

## 21 Abstract

22 **Importance:** Cases of the coronavirus disease 2019 (COVID-19) with no or mild symptoms  
23 were reported to frequently transmit the disease even without direct contact. The severe  
24 acute respiratory syndrome virus (SARS-COV-2) was found at very high concentrations in  
25 swab and sputum of such cases.

26 **Objective:** We aimed to estimate virus release from such cases into different aerosol sizes by  
27 normal breathing and coughing, and what exposure can result from this in a room shared  
28 with such as case.

29 **Data Sources and Model:** We combined the size-distribution of exhaled breath aerosols for  
30 coughing and normal breathing with viral sputum concentrations as approximation for lung  
31 lining liquid to obtain an estimate of emitted virus levels. The resulting emission data fed a  
32 single-compartment model of airborne concentrations in a room of 50m<sup>3</sup>, the size of a small  
33 office or medical exam room.

34 **Results:** The estimated viral load in aerosols emitted by patients while breathing normally  
35 was on average 0.34 copies/cm<sup>3</sup> and could go up to 11.5 copies/cm<sup>3</sup>. The corresponding  
36 numbers for coughing patients were 10,900 copies/cm<sup>3</sup> and 366,000 copies/cm<sup>3</sup>,  
37 respectively, per cough. The resulting concentrations in a room with a coughing emitter  
38 were always very high, up to 2.02\*10<sup>9</sup> copies/m<sup>3</sup>. However, also regular breathing aerosol  
39 from high emitters was predicted to lead to several thousand copies/m<sup>3</sup>.

40 **Conclusions and Relevance:** These very high predicted virus concentrations may provide an  
41 explanation why for COVID-19, frequent community transmissions from non-symptomatic  
42 cases and also high infection rates in medical staff in hospital settings were reported. Our  
43 findings suggest that strict respiratory protection is needed when there is a chance to be in

44 the same room with a patient - whether symptomatic or not - especially if this was for a  
45 prolonged time.

## 46 Introduction

47 The novel Coronavirus disease 2019 (COVID-19), emerged in late 2019 in Wuhan, China <sup>1</sup>  
48 from where it spread to the entire world. COVID-19 is caused by a novel type of Coronavirus,  
49 the severe acute respiratory syndrome virus (SARS-CoV-2) <sup>2</sup>. The host-receptor for SARS-  
50 CoV-2 was found to be Angiotensin I converting enzyme 2 (ACE2), which is present in cells of  
51 the lungs and airways <sup>3</sup>. A large number of patients hospitalized for other reasons and also  
52 an important proportion of the medical staff contracted COVID-19 <sup>4</sup>. This is remarkable given  
53 that medical professionals are trained at protecting themselves against infections. Also a  
54 series of community-transmissions were reported from cases that had no apparent  
55 symptoms, some even without direct contact <sup>5-8</sup>. Correspondences about the viral load in  
56 samples from COVID-19 patients having no or only mild symptoms reported very high  
57 concentrations of SARS-CoV-2 in swab samples <sup>8-10</sup>. This raised the question whether  
58 transfections could occur via the air.

59 When coughing, humans release thousands of aerosol droplets per cubic-centimeter in the  
60 size range of 0.6 to 15  $\mu\text{m}$ , with the droplet concentration increasing strongly with cough  
61 flow rate <sup>11</sup>. But also normal breathing will lead to some aerosol production, which is  
62 attributed to fluid film rupture in the respiratory bronchioles during inhalation leading to the  
63 formation of droplets that are released during exhalation <sup>12</sup>. The size of these droplets is  
64 mostly below 1  $\mu\text{m}$  <sup>13</sup>. The mode of droplet generation implies that they consist of lung lining  
65 liquid including dispersed viruses. Indeed, human volunteers exposed to virus-sized  
66 nanoparticles show nano-scaled particles in their exhaled breath <sup>14,15</sup>. Also, the described

67 size distribution of particles emitted from coughing as well as normal respiration suggests  
68 that an important proportion of them will be able to remain airborne for many hours in  
69 turbulent conditions <sup>16</sup>.

## 70 Objectives

71 This study aimed to estimate the cumulative viral load released from COVID-19 patients with  
72 no to moderate symptoms in different aerosol sizes via respiration and coughing. We then  
73 used this information to make a risk appraisal for the situation of a high emitter that is either  
74 breathing normally or coughing in a room operated at different air exchange rates. We  
75 chose a room size that is similar to a medical examination room or an office shared by two  
76 to three people.

## 77 Design and Methods

### 78 Concept:

79 The release of viruses from individual patients was modeled by first calculating the viral load  
80 per exhaled droplets formed during normal breathing and while coughing. The resulting size-  
81 distribution provided an initial estimate of the concentration of SARS-CoV-2 virus copies  
82 released by a regularly breathing or coughing patient. This viral emission factor was then fed  
83 into a well-mixed one-compartment model to simulate the situation in a closed room with  
84 different ventilation air exchange rates.

### 85 Data sources:

86 Data on the number of viral copies present in sputum was used to estimate the SARS-CoV-2  
87 viral load present in the lining liquid of respiratory bronchioles in patients <sup>9</sup>, specifically an  
88 average of  $7 \times 10^6$  copies/ml with a maximum of  $2.35 \times 10^9$  copies/ml (hereafter referred to

89 as "high emitters"), and 1,000 copies/ml representing a low-virus producing patient ("low  
90 emitters").

91 Exhaled aerosol size distributions and numbers were retrieved from published studies on  
92 coughing<sup>11</sup> and healthy persons<sup>12</sup>. Both studies assessed the size-number distribution of  
93 freshly emitted aerosols. The concentration of viral copies in each aerosol size was  
94 calculated from the volume of the aerosols, the actual count number in each size and the  
95 above-mentioned virus-load per ml sputum. The viral load in the actual aerosol counts in  
96 each aerosol size was then used to calculate the total viral concentration. The cumulative  
97 emissions in the PM<sub>10</sub> fraction were summed up after applying the standard size  
98 fractionation curves<sup>17</sup> to the aerosol distribution.

99 **Model:**

100 A one-compartment model estimated the virus load concentration C for a perfectly mixed  
101 room of volume V<sub>R</sub> of 50 m<sup>3</sup> with one patient as source, using the following mass-balance  
102 (equation 1):

$$103 \quad V_R * \frac{dC}{dt} = c_{PM10} * RR * V_t - \frac{V_R}{ER} * C(t) - \frac{\ln(2) * V_R}{t_{1/2}} * C(t) \quad (1)$$

104 The emission rate was calculated from the concentration c<sub>PM10</sub>, the viral load in the PM<sub>10</sub>-  
105 size range, which are particles collected with a 50% efficiency cut-off at 10 µm aerodynamic  
106 diameter; and a respiratory rate of 15 breaths per minute (RR) at a tidal volume of V<sub>t</sub> of 500  
107 ml per breath. Air exchange rates (ER) used were 1-, 3-, 10- and 20-times per hour. The virus'  
108 half-life t<sub>1/2</sub> of 1.1 hours was obtained from an experimental study about the persistence of  
109 SARS-CoV-2 on surfaces and when airborne<sup>18</sup>, tested by assessing the 50% tissue culture  
110 infective dose (TCID<sub>50</sub>).

111 The model for coughing was identical, except that coughing was assumed to happen every  
112 30 seconds at a volume of 250 ml.

113 All statistics and models were calculated using Stata/SE 15.1 (Mac 64-bit Intel, Rev. 03 Feb  
114 2020, StataCorp, College Station, TX, USA).

## 115 Results

### 116 Emissions from normal breathing patients

117 To estimate the virus emissions from patients breathing normally, we first calculated the  
118 viral load for the aerosol size distribution. Figure 1 shows that the highest virus load is  
119 present in the largest aerosol size. The cumulative total emission per breath was 0.34  
120 copies/cm<sup>3</sup>(air) for an average patient, and 11.5 copies/cm<sup>3</sup> for high emitters. The  
121 cumulative emissions in the PM<sub>10</sub> fraction were about 1/3 of these values with 0.12  
122 copies/cm<sup>3</sup> (average) and 4.1 copies/cm<sup>3</sup> (high) per breath.

### 123 Emission from coughing patient

124 We then estimated the virus emissions from a coughing patient (Figure 2). The cumulative  
125 total emission per cough was 19,400 copies/cm<sup>3</sup> for an average patient, and 651,315  
126 copies/cm<sup>3</sup> for high emitters. The cumulative emissions in the PM<sub>10</sub> fraction were about 1/2  
127 of these values with 10,900 copies/cm<sup>3</sup> (average) and 366,000 copies/cm<sup>3</sup> (high) per cough.

### 128 Exposure estimation for bystanders

129 To estimate the exposure of bystanders spending time in the same room as a COVID-19  
130 positive person, we calculated the time-course of the viral load in the thoracic size fraction  
131 for aerosols released from a high-emitter either breathing normally or coughing. Figure 3  
132 shows the results for a high-emitting patient coughing frequently.

133 For a typical hospital ventilation situation of 10 air exchanges per hour, the concentration  
134 plateaus after about 30 minutes, while for a typical office with 3 air exchanges/hour,  
135 concentrations continue to rise for almost three hours. In the used model, concentrations  
136 scale linearly with the patient emission rate, the plateau concentrations for different  
137 emitting patients and ventilation types are summarized in Table 1.

## 138 Discussion

139 An elevated number of viruses is expected to be released by COVID-19 patients in the form  
140 of airborne aerosols, especially when they are coughing. While the bigger portion of the  
141 emitted viral load is in the form of large particles that can deposit rapidly, there is also an  
142 important portion in the smaller size fractions. Small aerosols can remain airborne for an  
143 extended time <sup>16</sup> and are very effective at reaching the deeper regions of the lungs.

144 An average person breathes about a half m<sup>3</sup> per hour in resting state <sup>19</sup>, which can rapidly  
145 increase to several m<sup>3</sup> during exercise <sup>20</sup>. Thus, a person spending time in a room with an  
146 average emitting patient breathing normally has a realistic chance of inhaling tens to  
147 hundreds of copies of the virus even when keeping distance from that person. The situation  
148 is worse in the presence of a high emitter and worst if the patient is a coughing high emitter.

149 A review of a wide range of respiratory viruses suggests that the infective dose is often quite  
150 low. Sometimes as few as few hundred units of active virus (TCID<sub>50</sub>) <sup>21</sup> seem sufficient to  
151 provoke a disease. Thus, our modelling suggests that there is a clear risk of infections for a  
152 person spending an extended time in the room with an infected person, even if the distance  
153 is too large for direct transmission. The situation is worse if the person is coughing.

154 The very high virus load in exhaled respiratory aerosols proposed by our assessment may be  
155 an explanation why COVID-19 was associated with much more transfections to hospital staff

156 than what was expected from SARS<sup>4</sup>. While having everybody wear a surgical face mask can  
157 be an effective source control<sup>22</sup>, the protective factors may still be insufficient if an  
158 extended amount of time is spent in the same room, especially if the room is small and the  
159 ventilation low. Increasing ventilation can help to some extent but is not sufficient in a room  
160 of the size of a typical office or medical exam room. Note also that ventilation design for  
161 hospitals is complex and not always functioning as intended<sup>23</sup>.

162 What are the implications for the normal life and the workplace?

- 163 • The risk of infection is real when being near an infected person in a room for more  
164 than a few minutes and this even when keeping distance to that person.
- 165 • Sharing a workplace in a small room with a non-symptomatic case seems not  
166 advised. This implies that workplaces should not be shared as long as there are no  
167 rapid tests to differentiate between healthy and non-symptomatic cases.
- 168 • Medical staff is advised to wear the best possible respiratory protection whenever in  
169 the same room as a patient, especially when this person is coughing.
- 170 • In addition, every patient, also non-symptomatic ones, should wear a well-fitting  
171 surgical face mask to reduce emissions, which will increase the overall protection for  
172 the medical staff.

173 Our assessment has a number of limitations. Namely:

- 174 • The estimated virus levels strongly depend on the number of virus copies produced  
175 by a COVID-19 case. We used sputum data from a well described peer-reviewed  
176 study<sup>9</sup> assuming that it is a reasonable approximation for the virus load in the  
177 respiratory bronchioles, the space where most respiratory aerosols are formed. Our



178 high-emitter estimates would be 100-fold higher if the most extreme

179 correspondence data was used <sup>10</sup>.

180 • We used information about virus copies but compare the results with TCID<sub>50</sub> infective

181 dose. Research on other virus types suggests that the number of virus copies and

182 TCID<sub>50</sub> are comparable <sup>24</sup>. However, it would be important to confirm this

183 relationship for the case of SARS-CoV-2.

184 • For breath aerosols release, we used data reported for normal breathing young

185 healthy subjects. However, aerosol formation is influenced by surface tension of the

186 lung lining liquid <sup>25</sup>. It is likely that aerosol formation will be altered in COVID-19

187 positive cases but it is not clear in which direction.

188 • Aerosol droplet will shrink in dry air <sup>26</sup>, resulting in a shift to smaller particle sizes.

189 This will not directly change the number of copies in the PM<sub>10</sub> range but simply

190 upconcentrate the viral load per aerosol. While we addressed passivation of viruses

191 in the air by using the documented half-life <sup>18</sup>, it is still possible that viruses in smaller

192 droplets are quicker passivated because of shorter diffusion distances for airborne

193 oxidants and faster increasing salinity. Our estimates would be slightly smaller if this

194 was relevant.

## 195 Acknowledgments

196 This modelling was entirely funded by the Swiss Centre for Occupational and Environmental

197 Health (SCOEH).

## 198 References

- 199 • 1. Zhu N, Zhang D, Wang W, et al. A Novel Coronavirus from Patients with  
200 Pneumonia in China, 2019. *N Engl J Med*. 2020;382(8):727-733.  
201 doi:10.1056/NEJMoa2001017
- 202 • 2. Gorbalenya AE, Baker SC, Baric RS, et al. *Severe Acute Respiratory Syndrome-*  
203 *Related Coronavirus: The Species and Its Viruses – a Statement of the Coronavirus Study*  
204 *Group*. Microbiology; 2020. doi:10.1101/2020.02.07.937862
- 205 • 3. Qi F, Qian S, Zhang S, Zhang Z. Single cell RNA sequencing of 13 human tissues  
206 identify cell types and receptors of human coronaviruses. *Biochem Biophys Res*  
207 *Commun*. March 2020:S0006291X20305234. doi:10.1016/j.bbrc.2020.03.044
- 208 • 4. Wang D, Hu B, Hu C, et al. Clinical Characteristics of 138 Hospitalized Patients  
209 With 2019 Novel Coronavirus–Infected Pneumonia in Wuhan, China. *JAMA*.  
210 2020;323(11):1061. doi:10.1001/jama.2020.1585
- 211 • 5. Bai Y, Yao L, Wei T, et al. Presumed Asymptomatic Carrier Transmission of  
212 COVID-19. *JAMA*. February 2020. doi:10.1001/jama.2020.2565
- 213 • 6. Kimball A, Hatfield KM, Arons M, et al. Asymptomatic and Presymptomatic  
214 SARS-CoV-2 Infections in Residents of a Long-Term Care Skilled Nursing Facility - King  
215 County, Washington, March 2020. *MMWR Morb Mortal Wkly Rep*. 2020;69(13):377-  
216 381. doi:10.15585/mmwr.mm6913e1

- 217 • 7. Li R, Pei S, Chen B, et al. Substantial undocumented infection facilitates the  
218 rapid dissemination of novel coronavirus (SARS-CoV2). *Science*. March 2020.  
219 doi:10.1126/science.abb3221
- 220 • 8. Zou L, Ruan F, Huang M, et al. SARS-CoV-2 Viral Load in Upper Respiratory  
221 Specimens of Infected Patients. *N Engl J Med*. 2020;382(12):1177-1179.  
222 doi:10.1056/NEJMc2001737
- 223 • 9. Wölfel R, Corman VM, Guggemos W, et al. Virological assessment of  
224 hospitalized patients with COVID-2019. *Nature*. April 2020. doi:10.1038/s41586-020-  
225 2196-x
- 226 • 10. Pan Y, Zhang D, Yang P, Poon LLM, Wang Q. Viral load of SARS-CoV-2 in clinical  
227 samples. *Lancet Infect Dis*. 2020;20(4):411-412. doi:10.1016/S1473-3099(20)30113-4
- 228 • 11. Yang S, Lee GWM, Chen C-M, Wu C-C, Yu K-P. The Size and Concentration of  
229 Droplets Generated by Coughing in Human Subjects. *J Aerosol Med*. 2007;20(4):484-  
230 494. doi:10.1089/jam.2007.0610
- 231 • 12. Johnson GR, Morawska L. The Mechanism of Breath Aerosol Formation. *J*  
232 *Aerosol Med Pulm Drug Deliv*. 2009;22(3):229-237. doi:10.1089/jamp.2008.0720
- 233 • 13. Papineni RS, Rosenthal FS. The Size Distribution of Droplets in the Exhaled  
234 Breath of Healthy Human Subjects. *J Aerosol Med*. 1997;10(2):105-116.  
235 doi:10.1089/jam.1997.10.105

- 236 • 14. Gschwind S, Graczyk H, Günther D, Riediker M. A method for the preservation  
237 and determination of welding fume nanoparticles in exhaled breath condensate. *Env*  
238 *Sci Nano*. 2016;3(2):357–364. doi:10.1039/C5EN00240K
- 239 • 15. Sauvain J-J, Hohl MSS, Wild P, Pralong JA, Riediker M. Exhaled breath  
240 condensate as a matrix for combustion-based nanoparticle exposure and health effect  
241 evaluation. *J Aerosol Med Pulm Drug Deliv*. 2014;27(6):449–458.  
242 doi:10.1089/jamp.2013.1101
- 243 • 16. Willeke K, Baron PA, eds. *Aerosol Measurement: Principles, Techniques, and*  
244 *Applications*. New York: Van Nostrand Reinhold; 1993.
- 245 • 17. BSI. *EN 481:1993 Workplace Atmospheres. Size Fraction Definitions for*  
246 *Measurement of Airborne Particles*. BSI; 1993.
- 247 • 18. van Doremalen N, Bushmaker T, Morris DH, et al. Aerosol and Surface Stability  
248 of SARS-CoV-2 as Compared with SARS-CoV-1. *N Engl J Med*. March  
249 2020;NEJMc2004973. doi:10.1056/NEJMc2004973
- 250 • 19. Beardsell I, ed. *Get through MCEM. Part A: MCQs*. London: RSM; 2011.
- 251 • 20. Ramos CA, Reis JF, Almeida T, Alves F, Wolterbeek HT, Almeida SM. Estimating  
252 the inhaled dose of pollutants during indoor physical activity. *Sci Total Environ*.  
253 2015;527-528:111-118. doi:10.1016/j.scitotenv.2015.04.120
- 254 • 21. Yezli S, Otter JA. Minimum Infective Dose of the Major Human Respiratory  
255 and Enteric Viruses Transmitted Through Food and the Environment. *Food Environ*  
256 *Viro*. 2011;3(1):1-30. doi:10.1007/s12560-011-9056-7

- 257 • 22. Patel RB, Skaria SD, Mansour MM, Smaldone GC. Respiratory source control  
258 using a surgical mask: An *in vitro* study. *J Occup Environ Hyg*. 2016;13(7):569-576.  
259 doi:10.1080/15459624.2015.1043050
- 260 • 23. Grosskopf KR, Herstein KR. The aerodynamic behavior of respiratory aerosols  
261 within a general patient room. 2012;18(4):15.
- 262 • 24. Kim J-O, Kim W-S, Kim S-W, et al. Development and Application of  
263 Quantitative Detection Method for Viral Hemorrhagic Septicemia Virus (VHSV)  
264 Genogroup IVa. *Viruses*. 2014;6(5):2204-2213. doi:10.3390/v6052204
- 265 • 25. Edwards DA, Man JC, Brand P, et al. Inhaling to mitigate exhaled bioaerosols.  
266 *Proc Natl Acad Sci*. 2004;101(50):17383-17388. doi:10.1073/pnas.0408159101
- 267 • 26. Holmgren H, Bake B, Olin A-C, Ljungström E. Relation Between Humidity and  
268 Size of Exhaled Particles. *J Aerosol Med Pulm Drug Deliv*. 2011;24(5):253-260.  
269 doi:10.1089/jamp.2011.0880

270

## 271 [Figure legends](#)

272 Figure 1: Size distribution of exhaled aerosols (left) during normal respiration and resulting  
273 viral emissions per breath (right) for average (red), high and low emitters (spike-lines) per  
274 aerosol size.

275 Figure 2: Size distribution of exhaled aerosols (left) during coughing and resulting viral  
276 emissions per breath (right) with average (red), high and low emitters (spike-lines) per  
277 aerosol size.

278 Figure 3: Temporal course of airborne virus load in a perfectly mixed room of 50 m<sup>3</sup> for  
279 different air exchange rates. The emitter has a high virus-load in the lungs and is coughing  
280 intermittently.

281 Tables

282 Table 1: Plateau concentration for different combinations of air exchange rate, emission form and emitter type.

| <b>Air exchange rate (times/ hour)</b>                                | 1 / hour    | 3 / hour   | 10 / hour  | 20 / hour  |
|-----------------------------------------------------------------------|-------------|------------|------------|------------|
| <b>Time until 99% of plateau</b>                                      | 169 minutes | 77 minutes | 26 minutes | 14 minutes |
| <b>Airborne viral concentration at plateau (copies/m<sup>3</sup>)</b> |             |            |            |            |
| <b>Regular breathing</b>                                              |             |            |            |            |
| Low emitter                                                           | 0.0096      | 0.0043     | 0.0015     | 0.0008     |
| Average emitter                                                       | 44.80       | 20.18      | 6.87       | 3.54       |
| High emitter                                                          | 22,554      | 10,100     | 3,458      | 1,782      |
| <b>Frequent coughing</b>                                              |             |            |            |            |
| Low emitter                                                           | 859         | 386        | 132        | 67.9       |
| Average emitter                                                       | 4,010,000   | 1,800,000  | 615,000    | 317,000    |
| High emitter                                                          | 2.02e+09    | 9.06e+08   | 3.10e+08   | 1.60e+08   |

283

Figure 1

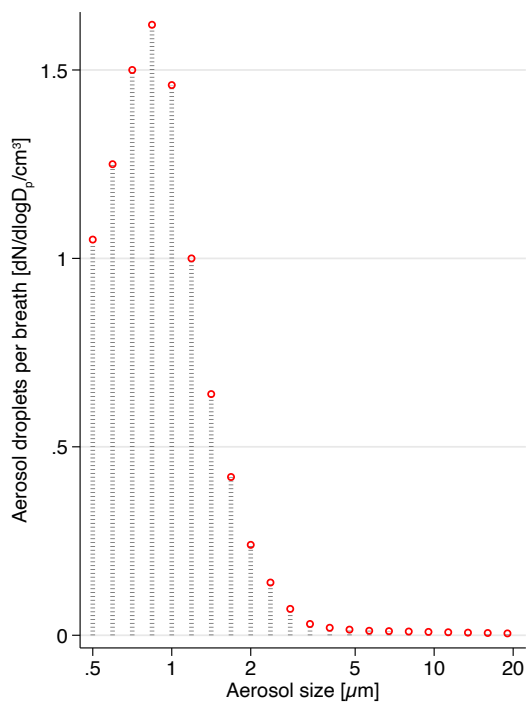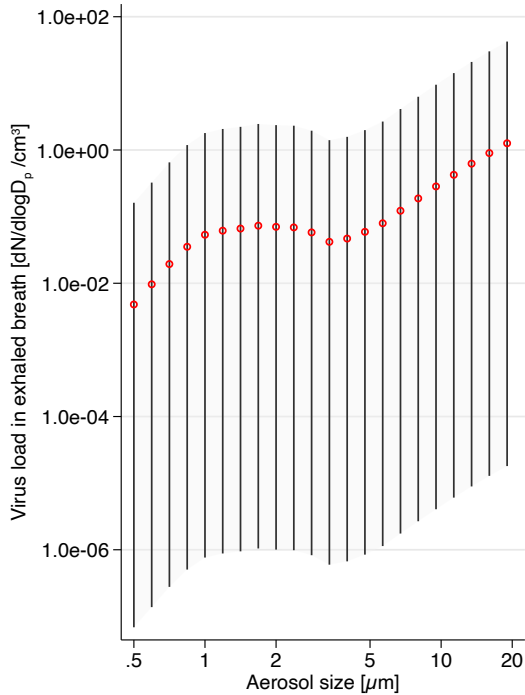



Figure 2

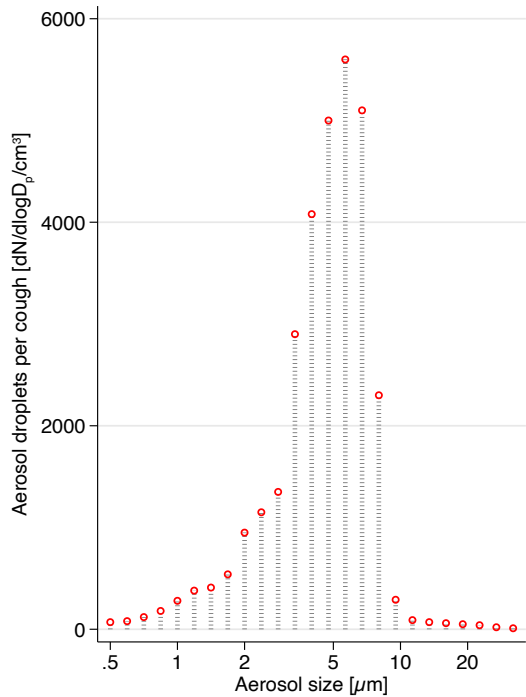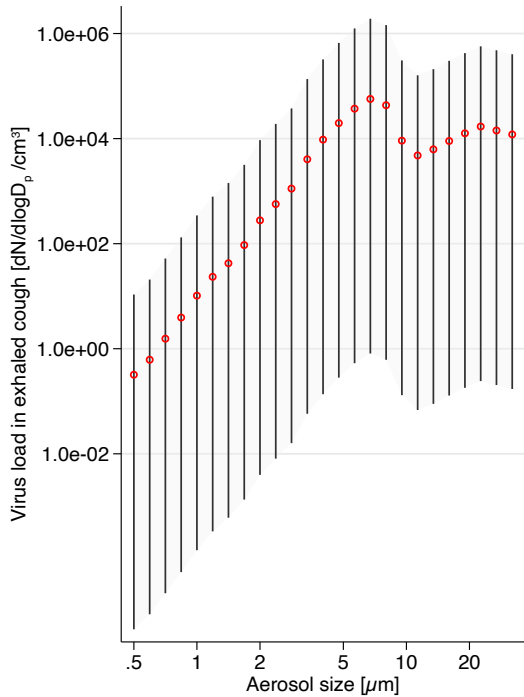

Figure 3

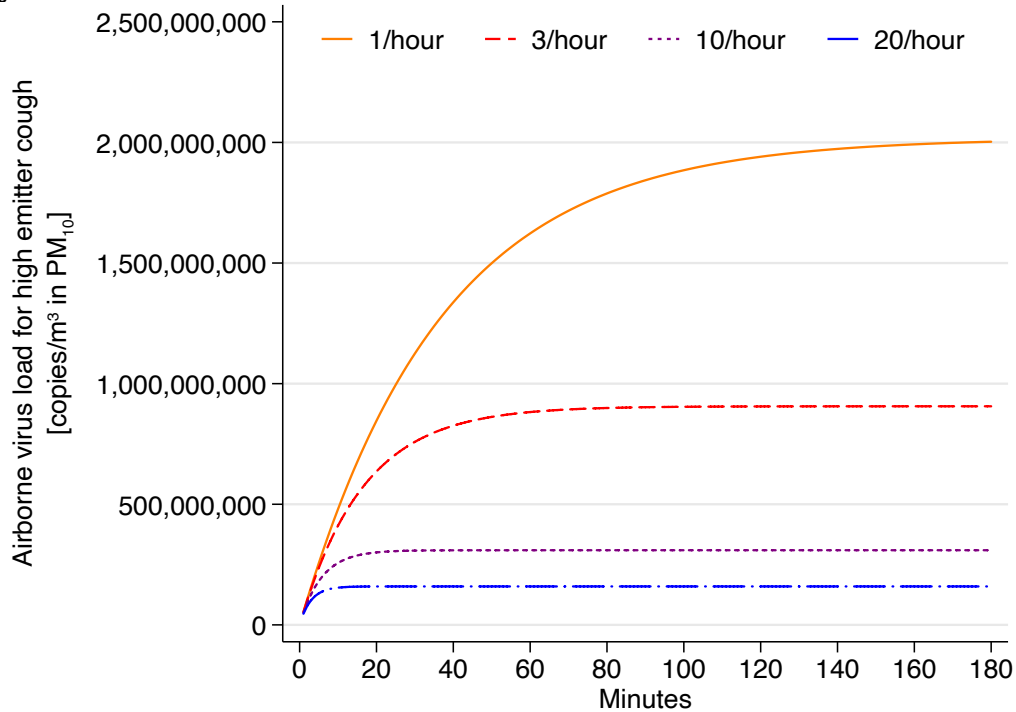

Source: https://medrxiv.org/content/medrxiv/early/2020/05/03/2020.04.27.20081398.full.pdf
